# Supplementary material for: External quality assessment (EQA) for tumor mutational burden: results of an international IQN path feasibility pilot scheme
Source: PubMed Central journal article supplement (PMC9931778; doi:10.1007/s00428-022-03444-y), 2022-11-10

**Supplementary Figure 1** -Results of the internal validation phase before ship to participating laboratories

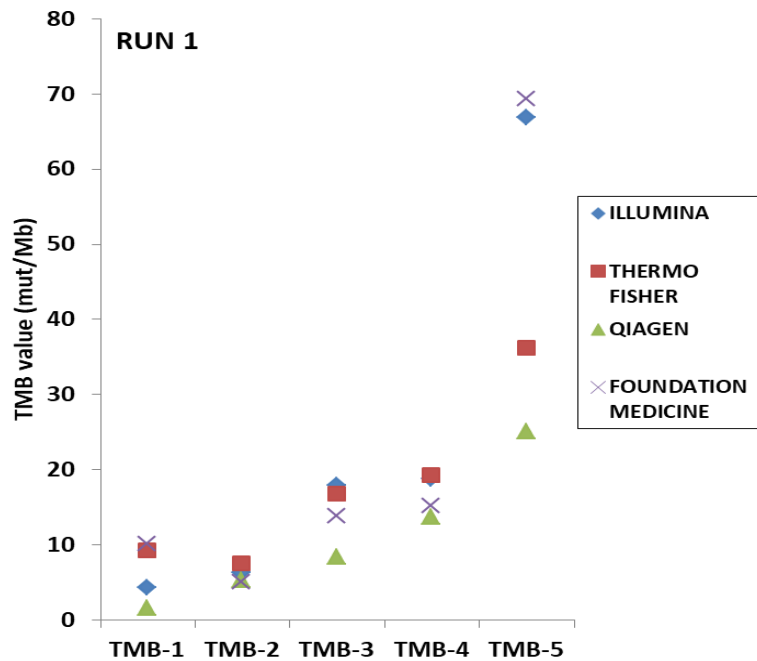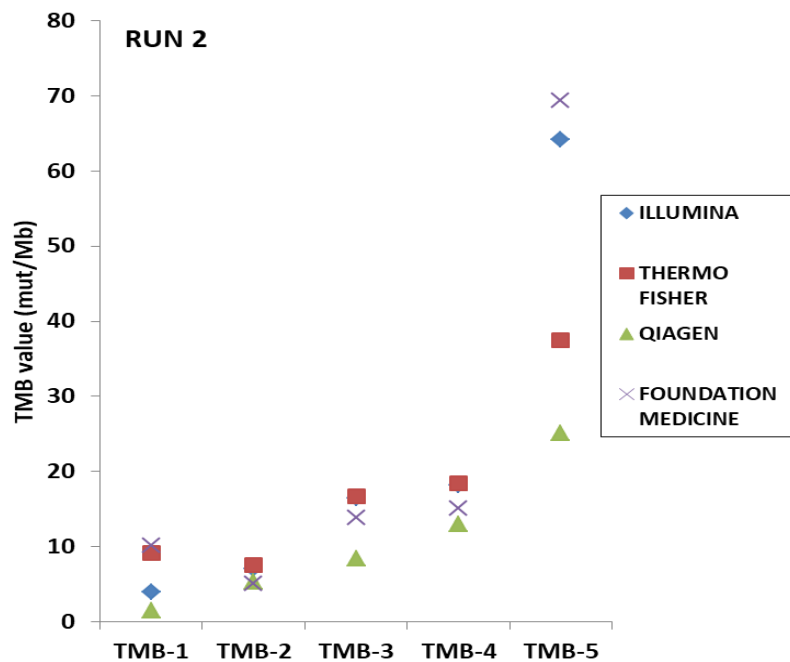

Supplementary Figure 2 - Summary of TMB results for OTML test submitted by different laboratories

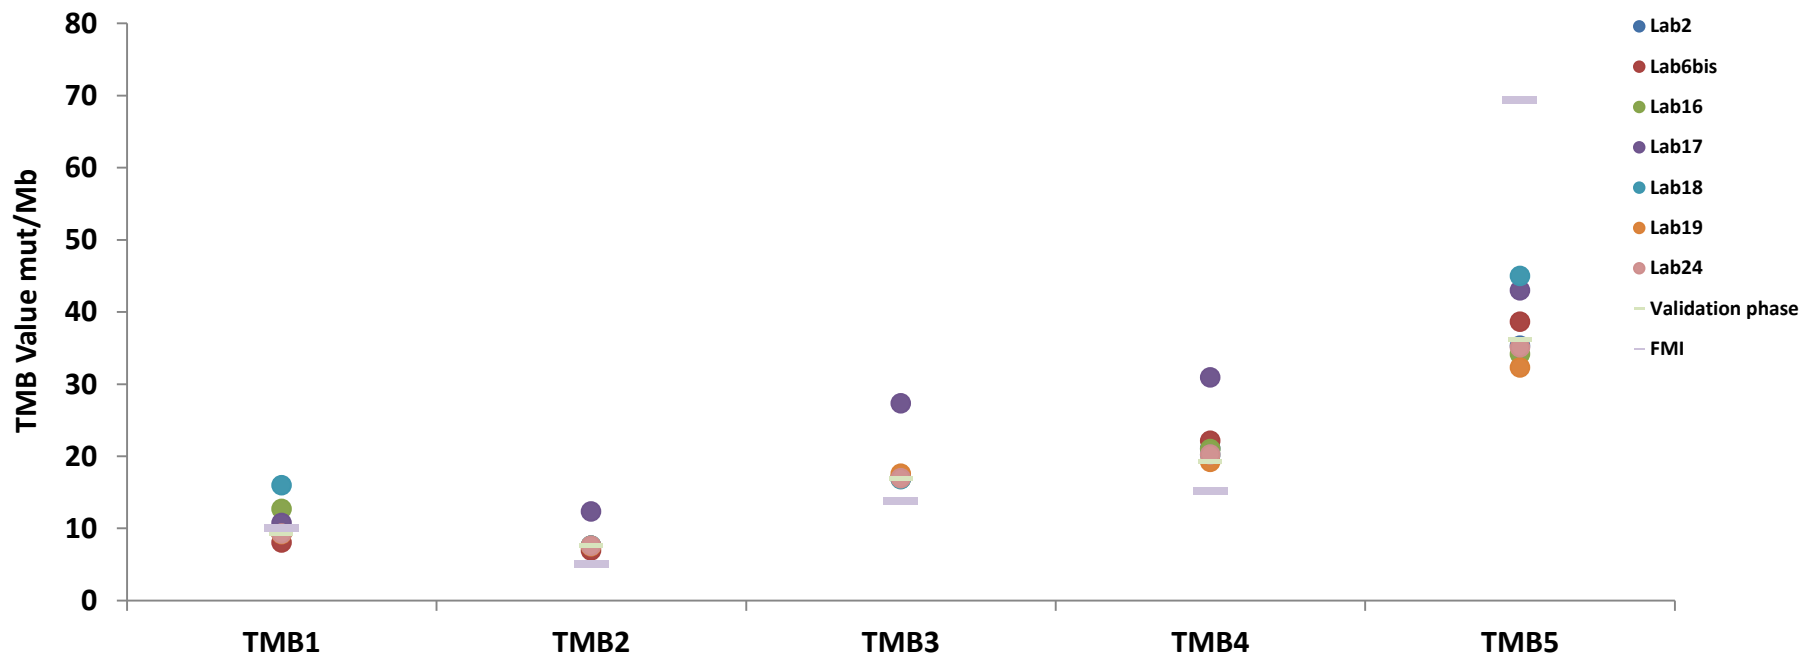

**Supplementary Figure 3 - Summary of TMB results for OCA Plus test submitted by different laboratories**

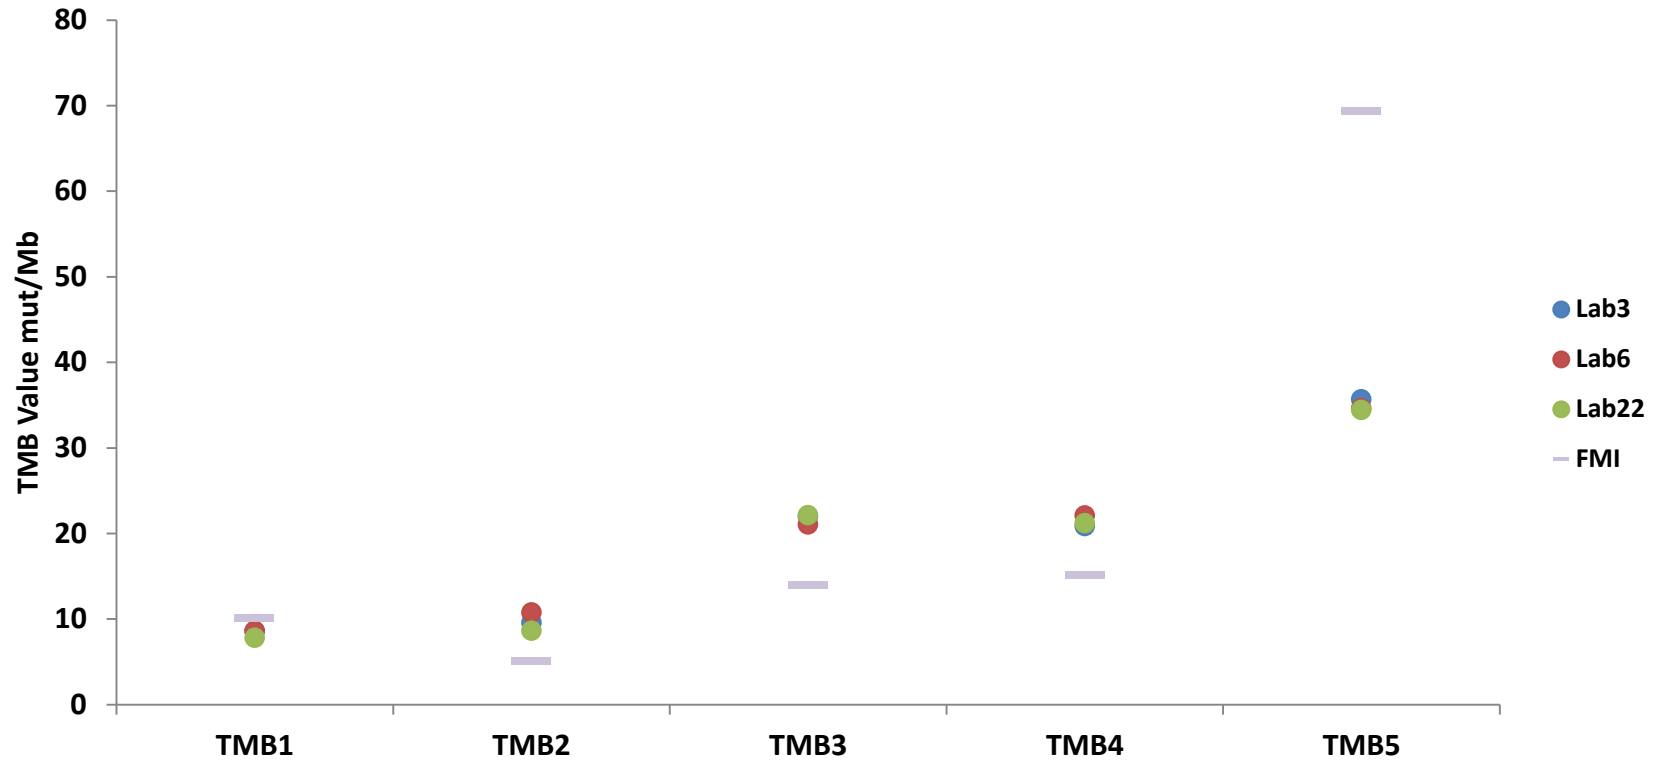

**Supplementary Figure 4 - Summary of TMB results for TSO500 assay submitted by different laboratories**

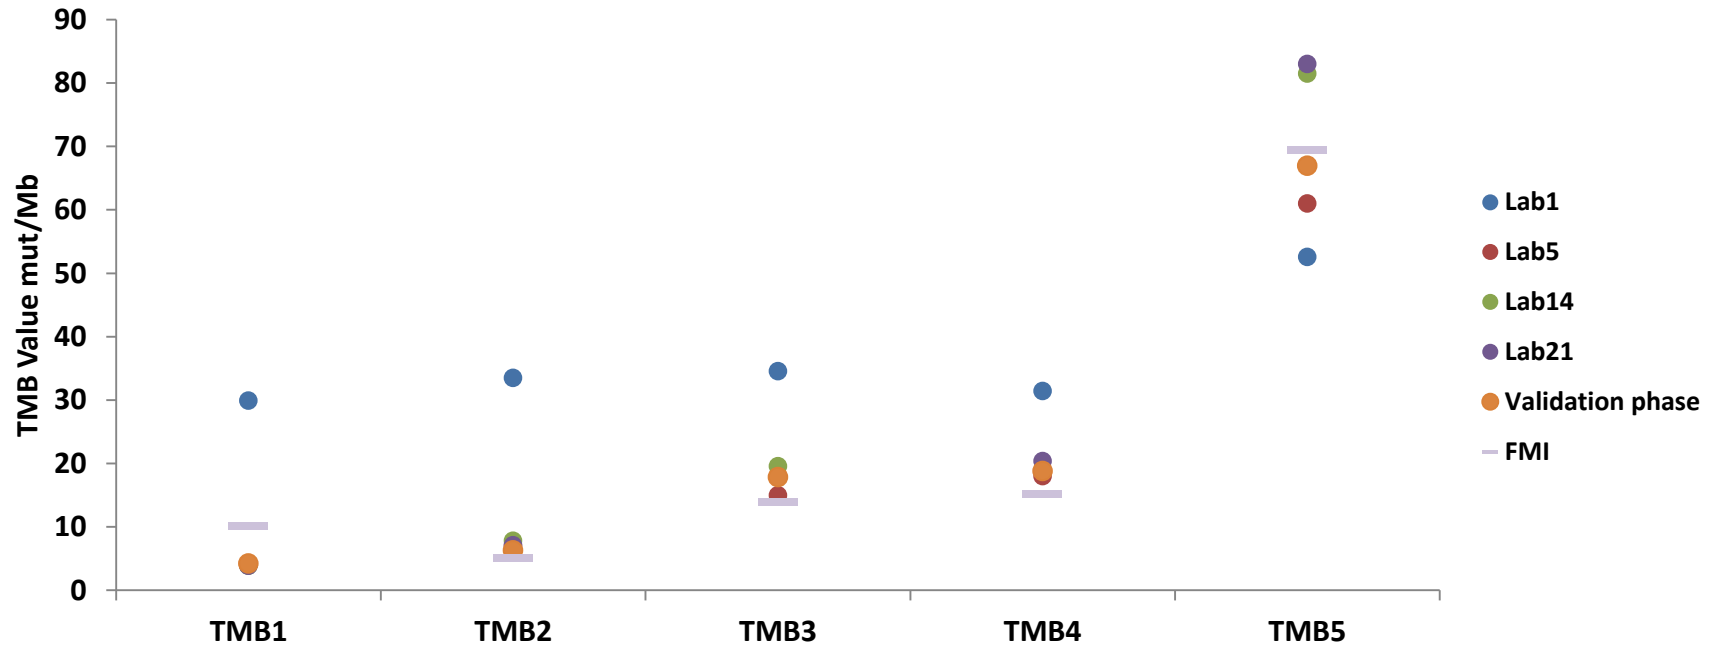

Supplementary Figure 5 - Summary of TMB results for WES approach submitted by different laboratories

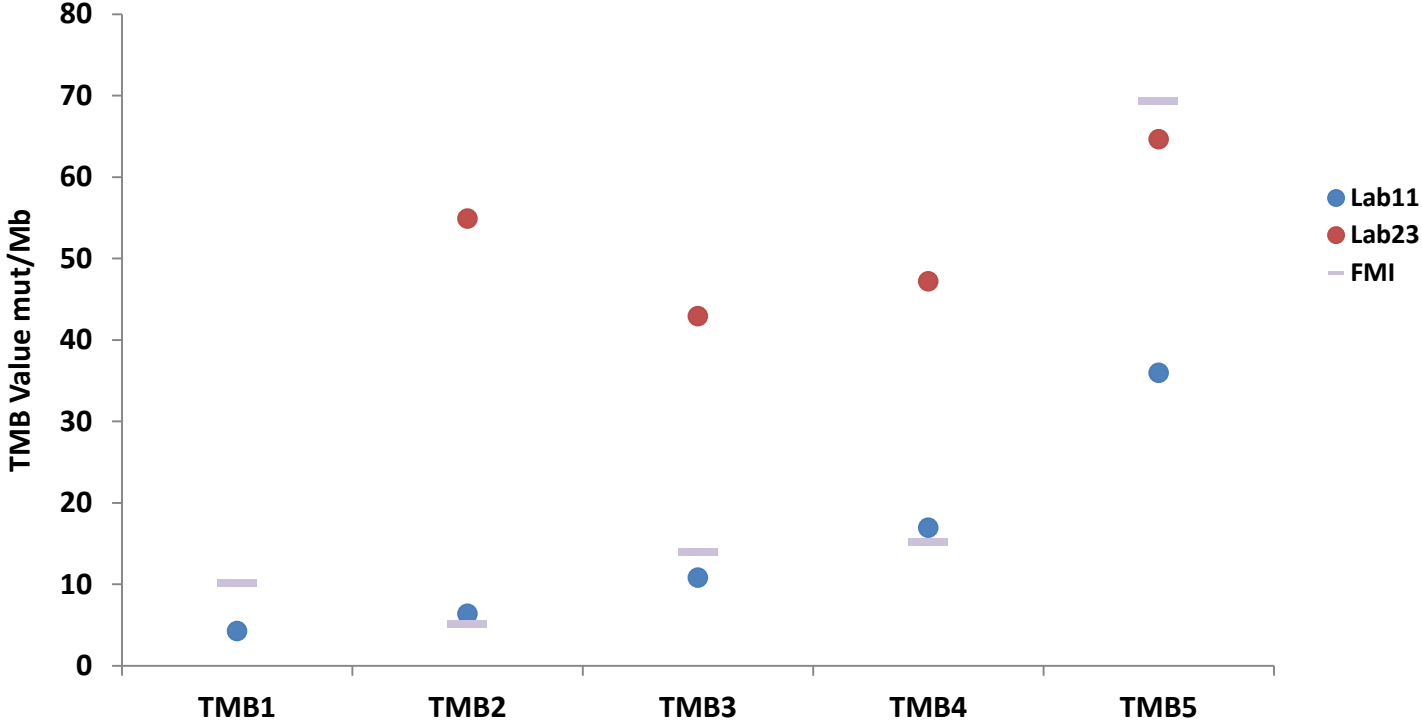

Supplementary Figure 6 - Summary of TMB results for clinical exome by different laboratories

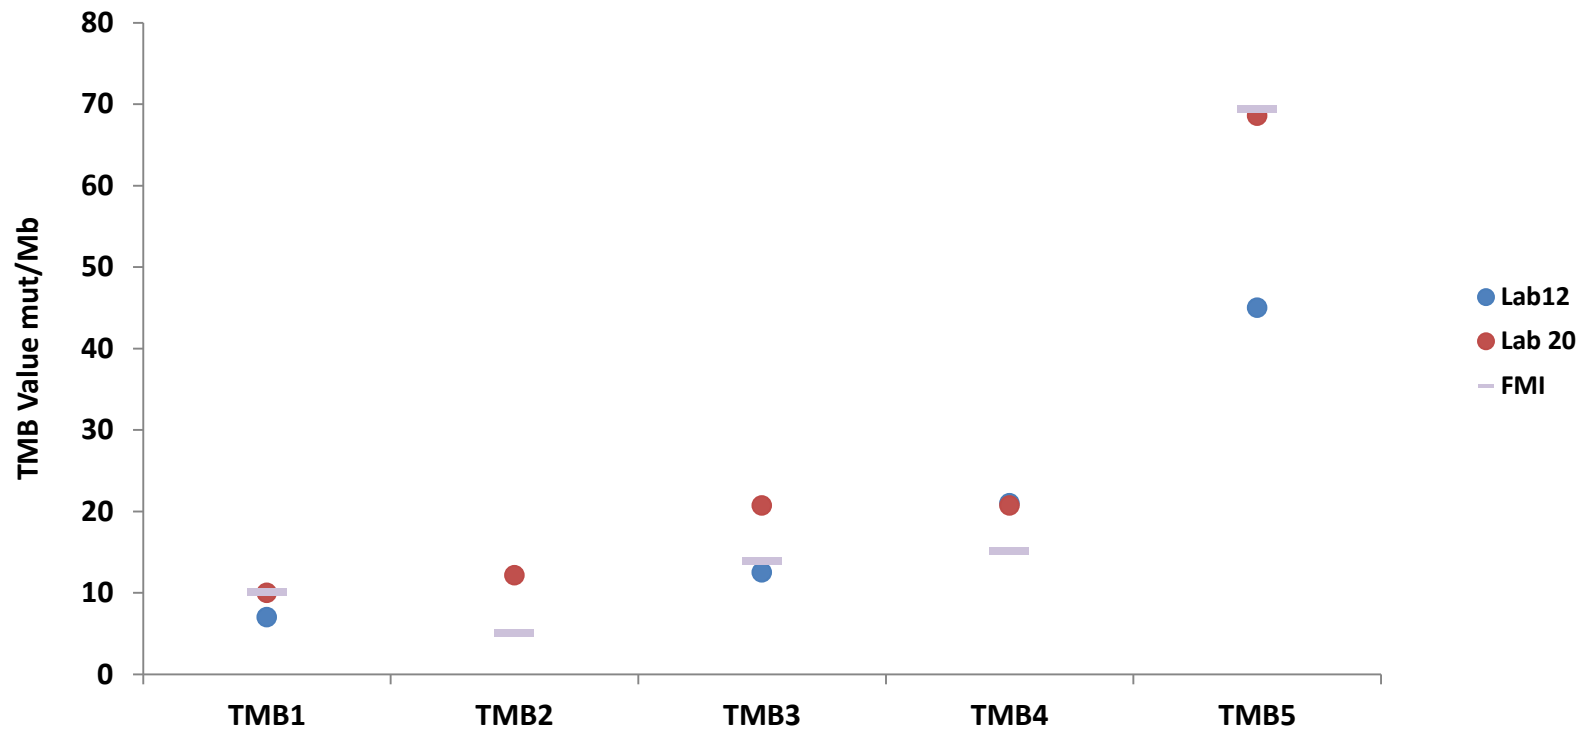

**Supplementary Figure 7-** Summary of results for TMB test with single method submitted by different laboratories

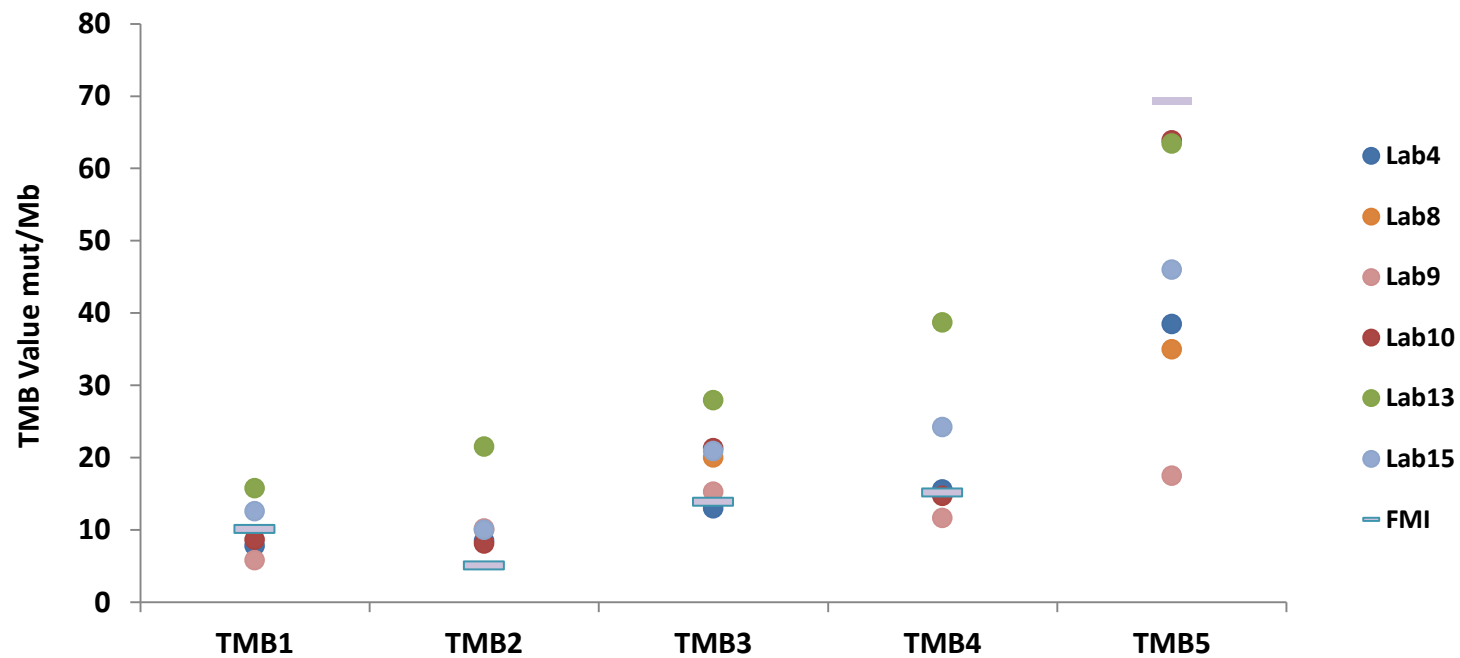

Supplement: 428_2022_3444_MOESM1_ESM.pdf [file 428_2022_3444_MOESM1_ESM.pdf]
