# Supplementary material for: External quality assessment (EQA) for tumor mutational burden: results of an international IQN path feasibility pilot scheme
Source: PubMed Central journal article supplement (PMC9931778; doi:10.1007/s00428-022-03444-y), 2022-11-10
Supplement: 428_2022_3444_MOESM2_ESM.pdf [file 428_2022_3444_MOESM2_ESM.pdf]

**Supplementary Table 1** – Results of the internal validation phase from 2X parallel runs for 4 different NGS panels for 9 tested cell lines.

| Cell line        | Illumina |         | ThermoFisher |       | Qiagen |       | Foundation Medicine |       |
|------------------|----------|---------|--------------|-------|--------|-------|---------------------|-------|
|                  | RUN1     | RUN2    | RUN1         | RUN2  | RUN1   | RUN2  | RUN1                | RUN2  |
| <b>NCI-H2009</b> | 18.801   | 18.147  | 19.31        | 18.41 | 13.69  | 12.92 | 15.13               | 15.13 |
| <b>NCI-H2126</b> | 17.864   | 16.479  | 16.81        | 16.74 | 8.38   | 8.38  | 13.87               | 13.87 |
| <b>NCI-H2171</b> | 4.248    | 3.92    | 9.24         | 9.19  | 1.52   | 1.52  | 10.09               | 10.09 |
| <b>NCI-H1437</b> | 6.282    | 7.058   | 7.54         | 7.56  | 5.33   | 5.33  | 5.04                | 5.04  |
| <b>NCI-H23</b>   | 15.667   | 13.298  | 23.5         | 24.26 | 9.11   | 9.88  | 27.74               | 27.74 |
| <b>NCI-H322</b>  | 8.651    | 8.632   | 10.9         | 10.9  | 6.09   | 5.32  | 25.22               | 25.22 |
| <b>SKMEL2</b>    | 18.003   | 25.174  | 17.56        | 17.53 | 16.71  | 16.72 | 34.04               | 44.13 |
| <b>C33A</b>      | 66.942   | 64.147  | 36.23        | 37.49 | 25.08  | 25.08 | 69.35               | 69.35 |
| <b>IGROV1</b>    | 112.715  | 113.429 | 71.6         | 61.73 | 51.66  | 51.66 | 71.87               | 76.91 |

**Supplementary Table 2 – Description of the participating NGS methods at the pilot EQA scheme**

| <b>Company</b>                  | <b>Panel Name</b>                    | <b>Type of NGS approach</b> | <b>Type of variants used to infer TMB</b>         | <b>Number of gene</b> |
|---------------------------------|--------------------------------------|-----------------------------|---------------------------------------------------|-----------------------|
| <b>IDT</b>                      | Custom panel                         | Gene targated               | Non synonymous mutations, Indels                  | 423                   |
| <b>Twist Bioscience</b>         | Custom panel                         | Gene targated               | Non-synonymous mutations, Splice variants, Indels | 350                   |
| <b>Twist Bioscience</b>         | Custom panel                         | Gene targated               | Synonymous and non-synonymous mutations, Indels   | 645                   |
| <b>Agilent</b>                  | Custom panel                         | Gene targated               | Non synonymous mutations, Indels                  | 431                   |
| <b>Illumina</b>                 | TruSight Oncology 500                | Gene targated               | Non synonymous mutations, Indels                  | 523                   |
| <b>Thermo Fisher Scientific</b> | Oncomine Tumor Mutation Load         | Gene targated               | Non synonymous and synonymous mutations, Indels   | 409                   |
| <b>Thermo Fisher Scientific</b> | Oncomine Tumor Mutation Load         | Gene targated               | Non synonymous mutations, Indels                  | 409                   |
| <b>Thermo Fisher Scientific</b> | Oncomine Comprehensive Assay Plus    | Gene targated               | Non synonymous mutations, Indels                  | 514                   |
| <b>IDT</b>                      | IDT xGen Pan-Cancer Panel v2.4       | Clinical exome              | Non synonymous mutations                          | 523                   |
| <b>Agilent</b>                  | Custom Panel                         | Clinical exome              | Non synonymous mutations, Indels                  | 431                   |
| <b>Twist Bioscience</b>         | Twist human Exome plus               | Whole exome sequencing      | Non-synonymous mutations, Splice variants, Indels | 22000                 |
| <b>Roche</b>                    | Nimblegen (Roche) SeqCap EZ MedExome | Whole exome sequencing      | Synonymous and non-synonymous mutations, Indels   | 22334                 |
